# Supplementary material
Source: PubMed Central journal article supplement (PMC6854665)
Supplement: NIHMS1057846-supplement-Supplement.pdf [file NIHMS1057846-supplement-Supplement.pdf]

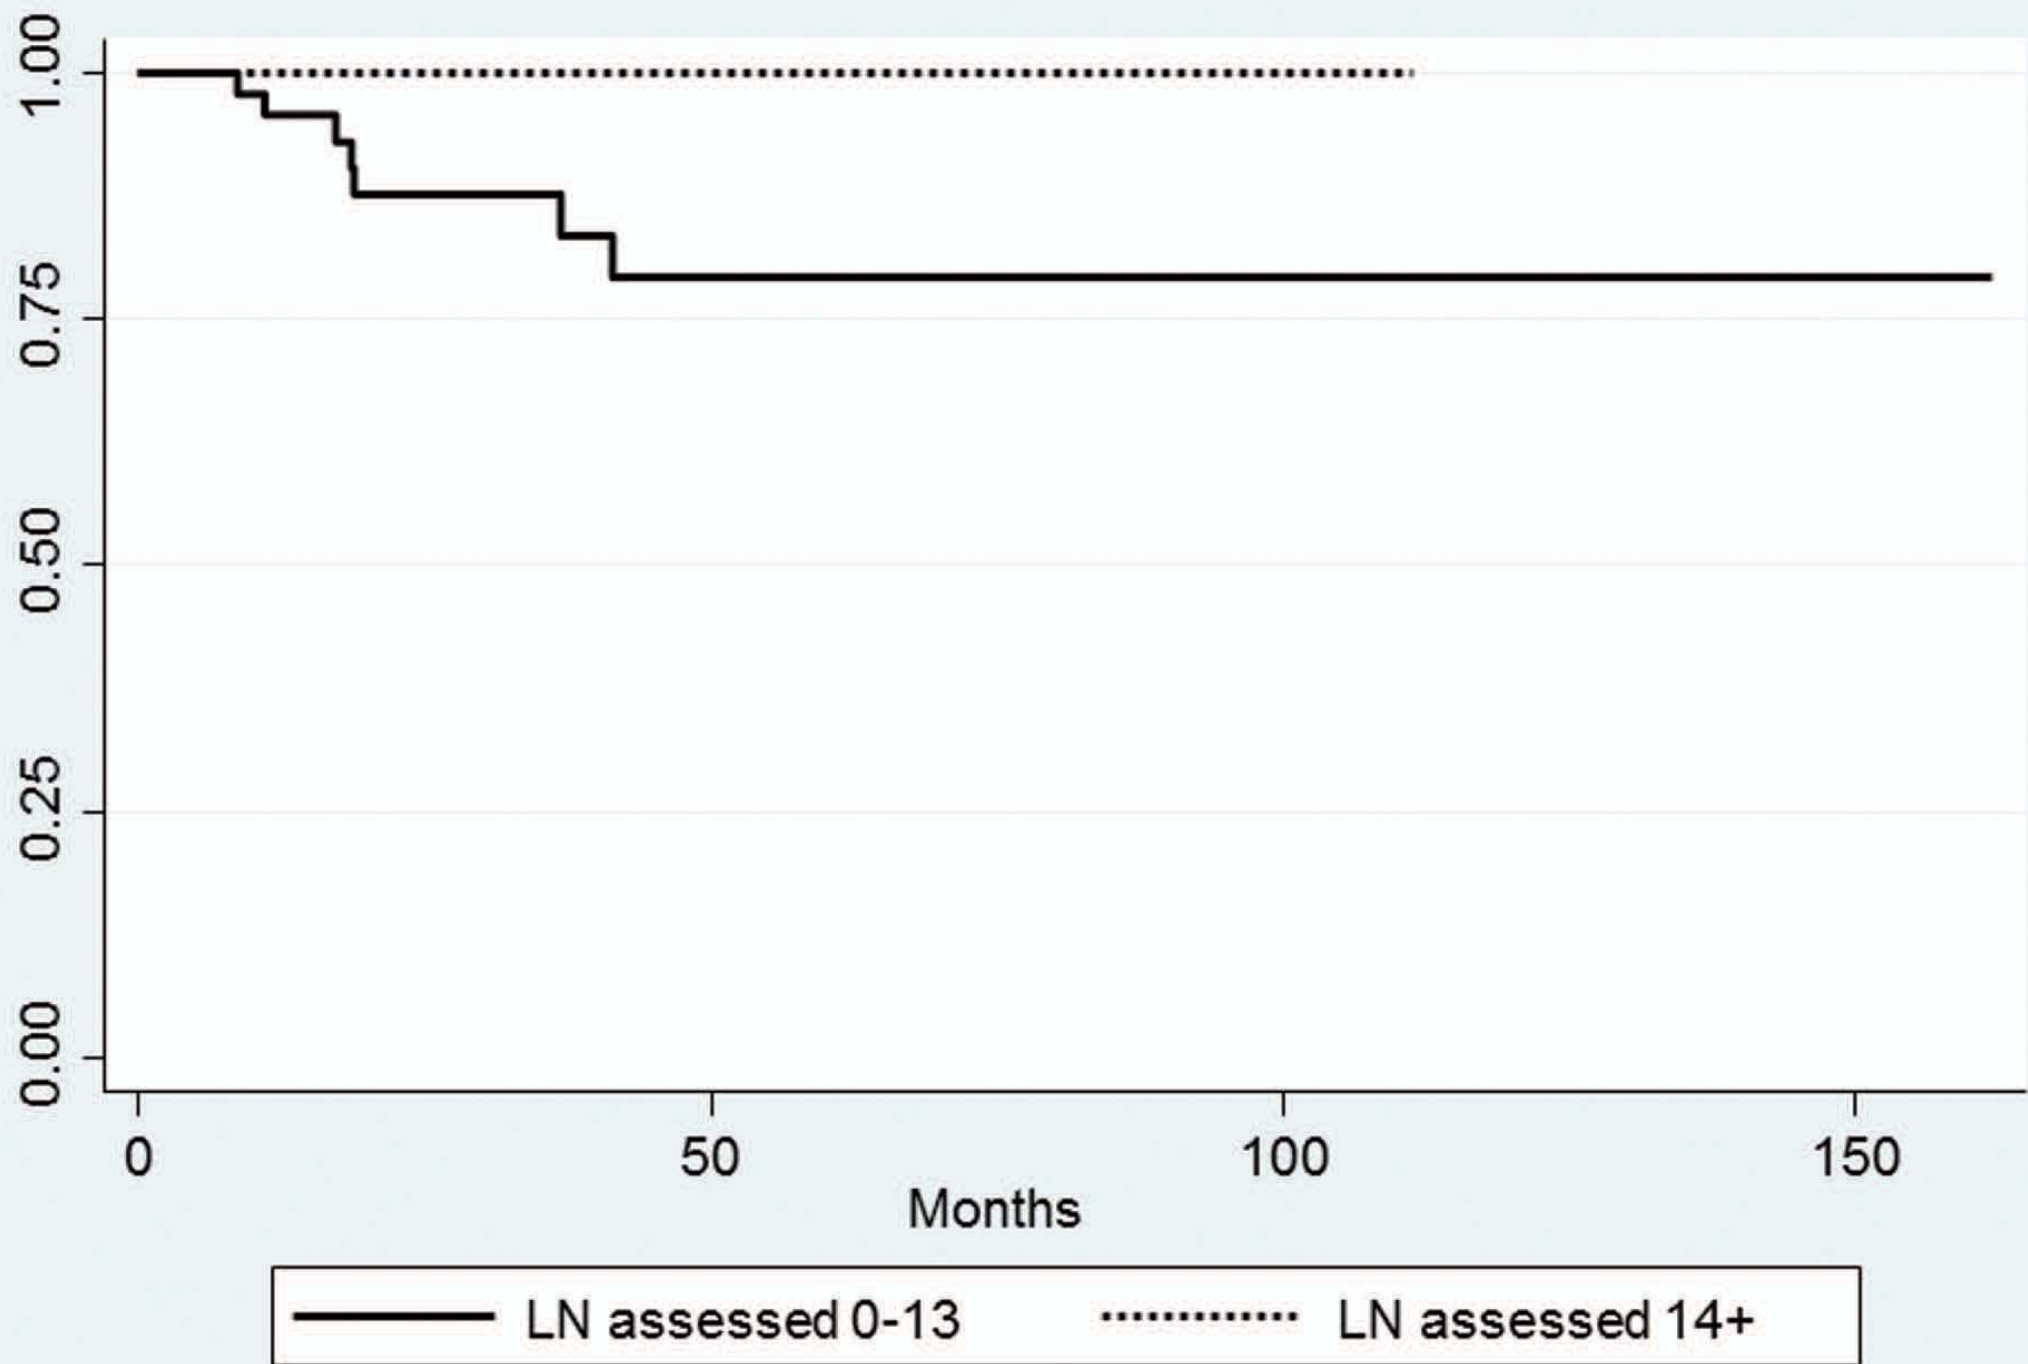

Figure 4. Kaplan-Meier curves for relapse-free survival according to number of lymph nodes assessed.
